# Supplementary material for: Megafauna in Salt Marshes
Source: Frontiers journal article supplement (doi:10.3389/fmars.2020.561476), 2020-11-13
Supplement: Data_Sheet_1.docx [file Data_Sheet_1.docx]

Supplementary Material

# Supplementary Figures and Table


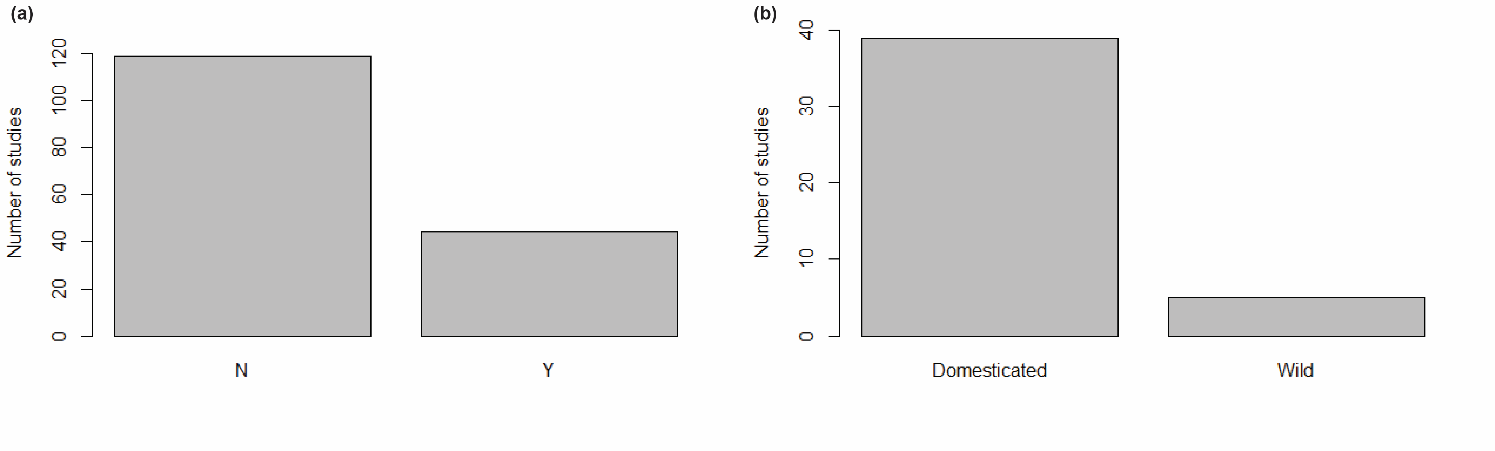


**Supplemental Figure 1.** (A) Number of consumer effects studies which examine megafauna species, based on the He & Silliman 2016 data set. 163 marshes studies were examined total, with 44 studies that focused on megafauna (27%). (B) The number of studies that examined domesticated or wild megafauna species within the He & Silliman 2016 consumer effects data set. Of the 44 total megafauna studies, 5 looked at wild animals (11%), and 39 looked at domesticated animals (89%).


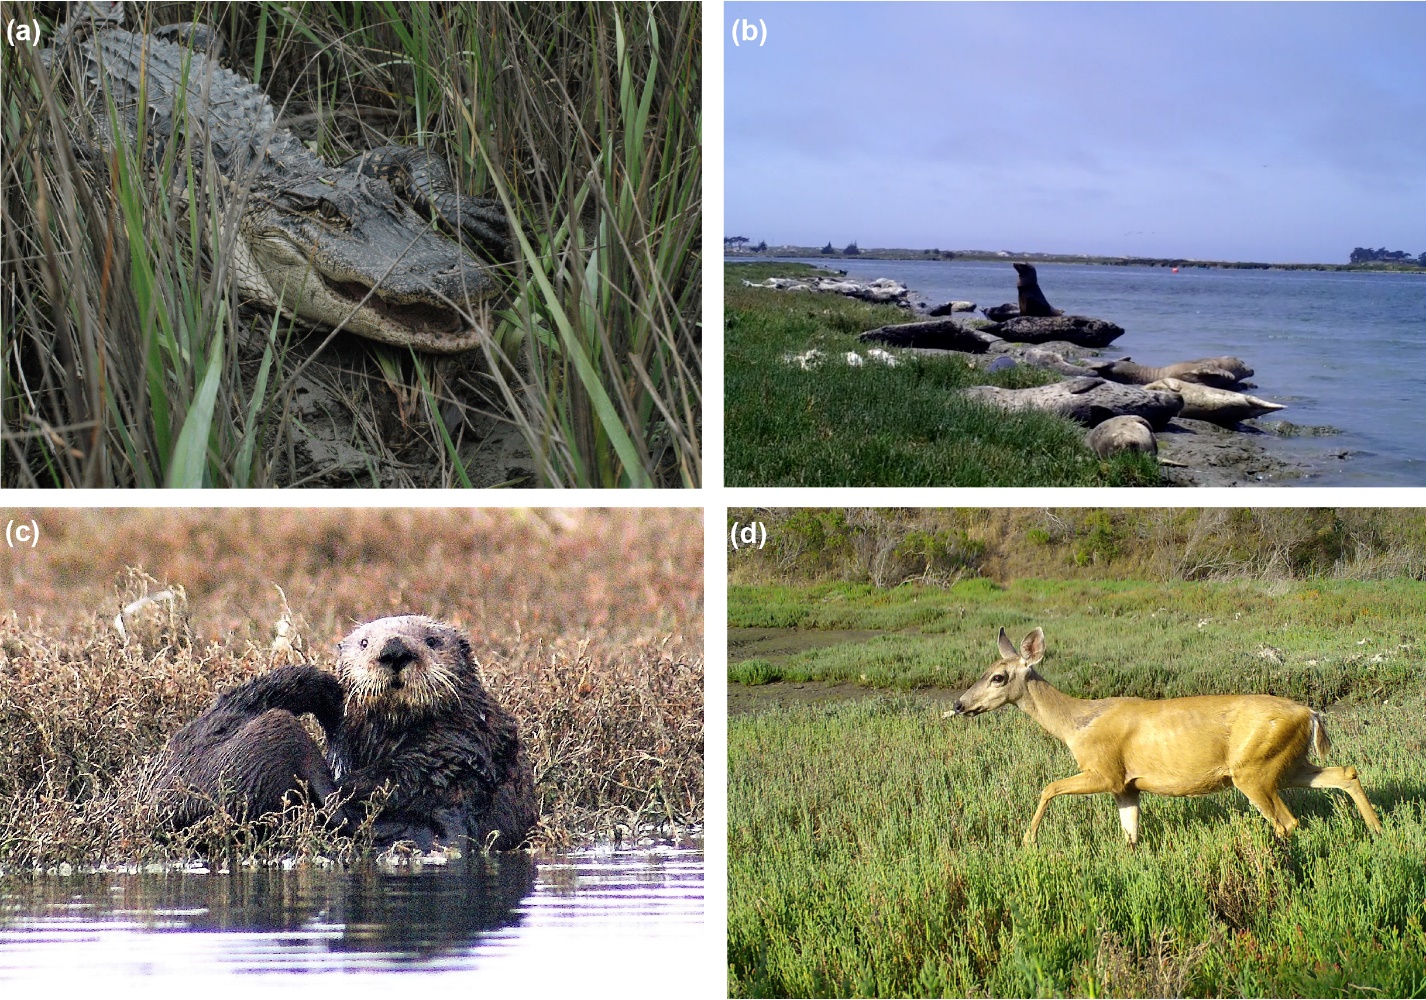


**Supplemental Figure 2.** Megafauna in salt marshes include (A) American alligator (*Alligator mississippiensis*; photo: J. Nifong), (B) sea lion (*Zalophus californianus*) and harbor seals (*Phoca vitulina*; photo: L. Gaskins), (C) sea otter (*Enhydra lutris*; photo: R. Eby), (D) mule deer (*Odocoileus hemionus*; photo: L. Gaskins).

**Supplemental Table 1.** Megafauna documented in salt marshes through a literature review and through personal observations. Each animal includes the common name, scientific name, density (when available), reference(s), and the country where the animal was observed in a salt marsh.

| **English Common name** | **Scientific name** | **Density** | **Reference(s)** | **Country** |
| --- | --- | --- | --- | --- |
| African Buffalo | *Syncerus caffer* |  | JB Adams pers obs | South Africa |
| Alligator Gar | *Atractosteus spatula* |  | (Selman, 2018) | USA |
| American Alligator | *Alligator mississippiensis* | 0.3-6.3 indiv/km of creek, average of 3.45 ind/km (salt marsh), 2.25 ind/km (lake, river, swamp, freshwater marsh) | (Nifong and Silliman, 2013; Nifong et al., 2014; Murray et al., 2015), (Nifong et al., 2015), (O'Brien and Doerr, 1986), Webb unpublished data, (Wood et al., 1985) | USA |
| American Crocodile | *Crocodylus acutus* |  | (FNAI, 2010) | USA |
| Black Bear | *Ursus americanus* | 0.16-0.30 bears/km2, average of 0.23 bears/km2 (salt marsh), 0.258 bears/km2 (forest) | (Lombardo, 1993; Smith et al., 2012), (Lombardo, 1993), (Schwartz and Franzmann, 1989) | USA |
| Bottlenose Dolphin | *Tursiops truncatus* | 3.7-5.4 indiv/km2, average of 4.55 indiv/km2 (salt marsh), 6.4-14.6 indiv/km2, average of 10.5 indiv/km2 (gulf) | (Young and Phillips, 2002; Balmer et al., 2011), (Mullin, 1990) (both densities) | USA |
| Broadnose Sevengill Shark | *Notorynchus cepedianus* |  | (Russo, 2015) | USA |
| Brown Bear | *Ursus arctos* |  | (Smith et al., 2004) | USA |
| Bull Shark | *Carcharhinus leucas* |  | (Bangley, 2016) | USA |
| Cattle | *Bos taurus* | 0.5-2 indiv/ha (salt marsh) | (Jensen, 1985; Amaral and Jablonski, 2005), JB Adams pers obs, (Andresen et al., 1990) | Denmark, Brazil, South Africa |
| Common Warthog | *Phacochoerus africanus* |  | JB Adams per obs | South Africa |
| Common Zebra | *Equus quagga burchellii* |  | JB Adams per obs | South Africa |
| Donkey | *Equus africanus asinus* |  | JB Adams pers obs | South Africa |
| Florida Panther | *Puma concolor coryi* |  | D Onorato pers obs | USA |
| Gemsbok | *Oryx gazella* |  | JB Adams pers obs | South Africa |
| Goat | *Capra aegagrus hircus* |  | JB Adams per sobs | South Africa |
| Gray Wolf | *Canis lupus* |  | (Smith et al., 2004) | USA |
| Green Turtle | *Chelonia mydas* |  | (Nagaoka et al., 2012) | Brazil |
| Harbor Seal | *Phoca vitulina* | 18.42 ind/km shoreline (salt marsh), 10.1 ind/km shoreline (outer coast) | (Eby et al., 2017), (Form, 2016), (Akeman and Akeman, 2016) | USA |
| Hippopotamus | *Hippopotamus amphibius* |  | JB Adams per obs | South Africa |
| Lion | *Panthera leo* |  | (Stander, 2019) | Namibia |
| Loggerhead Turtle | *Caretta caretta* |  | (Stoneburner et al., 1982) | USA |
| Mule Deer | *Odocoileus hemionus* |  | LC Gaskins pers obs | USA |
| Nile Crocodile | *Crocodylus niloticus* |  | JB Adams pers obs | South Africa |
| Ostrich | *Struthio camelus* |  | JB Adams pers obs | South Africa |
| Sea Lion | *Zalophus californianus* |  | LC Gaskins pers obs | USA |
| Sea Otter | *Enhydra lutris* | 0.61 indiv/ha (salt marsh), 0.0445 indiv/ha (kelp forest) | (Eby et al., 2017), (Tinker et al., 2018), (Nicholson et al., 2018) | USA |
| Sheep | *Ovis aries* | 1.5-10 indiv/ha (salt marsh) | (Ranwell, 1961; Laffaille et al., 2000), JB Adams pers obs, (Berg et al., 1997) | England, France, South Africa |
| Springbok | *Antidorcas marsupialis* |  | JB Adams pers obs | South Africa |
| Water Buffalo | *Bubalus bubalis* | 1.0-1.3 indiv/ha (salt marsh) | (Amaral and Jablonski, 2005), (Sweers et al., 2013) | Brazil |
| West Indian Manatee | *Trichechus manatus* |  | (Wingard and Lorenz, 2014) | USA |
| White-tailed Deer | *Odocoileus virginianus* |  | JP Morton pers obs | USA |
| Wild Boar | *Sus scrofa* |  | (Sharp and Angelini, 2016) | USA |
| Wild & Domesticated Horse | *Equus ferus, Equus ferus caballus* | 0.39 indiv/ha low marsh (wild horse salt marsh), 0.035 indiv/ha (wild horse mountainous national park) | (Beeftink, 1977; Turner, 1987) (wild horse), JB Adams pers obs (domesticated horse), (Taggart, 2008) (density, wild horse), (Dawson and Hone, 2012) (density, mountains) | N&W European countries, USA, South Africa |

# Supplementary References

[Dataset] Akeman, T., and Akeman, K. (2016). *Monterey Bay National Marine Sanctuary’s Bay Net Program Harbor Seal Count Dataset.*

Amaral, A.C.Z., and Jablonski, S. (2005). Conservation of marine and coastal biodiversity in Brazil. *Conservation Biology* 19(3)**,** 625-631.

Andresen, H., Bakker, J., Brongers, M., Heydemann, B., and Irmler, U. (1990). Long-term changes of salt marsh communities by cattle grazing. *Vegetatio* 89(2)**,** 137-148.

Balmer, B.C., Schwacke, L.H., Wells, R.S., George, R.C., Hoguet, J., Kucklick, J.R., et al. (2011). Relationship between persistent organic pollutants (POPs) and ranging patterns in common bottlenose dolphins (Tursiops truncatus) from coastal Georgia, USA. *Science of the Total Environment* 409(11)**,** 2094-2101.

Bangley, C. (2016). *Delineation of Coastal Shark Habitat Within North Carolina Waters Using Acoustic Telemetry, Fishery-independent Surveys, and Local Ecological Knowledge.* East Carolina University.

Beeftink, W. (1977). coastal salt marshes of western and northern Europe: an ecological and phytosociological approach. *Ecosystems of the World*.

Berg, G., Esselink, P., Groeneweg, M., and Kiehl, K. (1997). Micropatterns in Festuca rubra-dominated salt-marsh vegetation induced by sheep grazing. *Plant Ecology* 132(1)**,** 1-14.

Dawson, M., and Hone, J. (2012). Demography and dynamics of three wild horse populations in the Australian Alps. *Austral Ecology* 37(1)**,** 97-109.

Eby, R., Scoles, R., Hughes, B.B., and Wasson, K. (2017). Serendipity in a salt marsh: detecting frequent sea otter haul outs in a marsh ecosystem. *Ecology*.

FNAI (2010). Guide to the natural communities of Florida: 2010 edition. *Florida Natural Areas Inventory, Tallahassee, FL*.

[Dataset] Form, S. (2016). *Elkhorn Slough National Estuarine Research Reserve (ESNERR) Harbor Seal Counts Dataset.*

Jensen, A. (1985). The effect of cattle and sheep grazing on salt-marsh vegetation at Skallingen, Denmark. *Vegetatio* 60(1)**,** 37-48.

Laffaille, P., Lefeuvre, J.-C., and Feunteun, E. (2000). Impact of sheep grazing on juvenile sea bass, Dicentrarchus labrax L., in tidal salt marshes. *Biological Conservation* 96(3)**,** 271-277.

Lombardo, C.A. (1993). Population ecology of black bears on Camp Lejeune, North Carolina.

Mullin, K.D. (1990). Comparative seasonal abundance and ecology of Bottlenose Dolphins (Tursiops truncatus) in three habitats of the north-central Gulf of Mexico.

Murray, C., Rheubert, J., Easter, M., Merchant, M., and Crother, B. (2015). Heterophil/Lymphocyte Alterations as a Measure of Stress in American Alligators in Relation to Anthropogenic Disturbance in a Louisiana Intermediate Marsh. *Journal of Marine Science and Engineering* 3(2)**,** 267-275.

Nagaoka, S.M., Martins, A.S., Dos Santos, R.G., Tognella, M.M.P., de Oliveira Filho, E.C., and Seminoff, J.A. (2012). Diet of juvenile green turtles (Chelonia mydas) associating with artisanal fishing traps in a subtropical estuary in Brazil. *Marine Biology* 159(3)**,** 573-581.

Nicholson, T.E., Mayer, K.A., Staedler, M.M., Fujii, J.A., Murray, M.J., Johnson, A.B., et al. (2018). Gaps in kelp cover may threaten the recovery of California sea otters. *Ecography* 41(11)**,** 1751-1762.

Nifong, J.C., Layman, C.A., and Silliman, B.R. (2015). Size, sex and individual‐level behaviour drive intrapopulation variation in cross‐ecosystem foraging of a top‐predator. *Journal of Animal Ecology* 84(1)**,** 35-48.

Nifong, J.C., Nifong, R.L., Silliman, B.R., Lowers, R.H., Guillette Jr, L.J., Ferguson, J.M., et al. (2014). Animal-borne imaging reveals novel insights into the foraging behaviors and diel activity of a large-bodied apex predator, the American alligator (Alligator mississippiensis). *PloS one* 9(1)**,** e83953.

Nifong, J.C., and Silliman, B.R. (2013). Impacts of a large-bodied, apex predator (Alligator mississippiensis Daudin 1801) on salt marsh food webs. *Journal of Experimental Marine Biology and Ecology* 440**,** 185-191.

O'Brien, T.G., and Doerr, P.D. (1986). Night count surveys for alligators in coastal counties of North Carolina. *Journal of herpetology* 20(3)**,** 444-448.

Ranwell, D. (1961). Spartina salt marshes in southern England: I. The effects of sheep grazing at the upper limits of Spartina marsh in Bridgwater Bay. *The Journal of Ecology***,** 325-340.

Russo, R.A. (2015). Observations of predation and loss among leopard sharks and brown smoothhounds in San Francisco Bay, California. *Calif Fish Game* 101**,** 149-157.

Schwartz, C.C., and Franzmann, A.W. (1989). Bears, wolves, moose, and forest succession, some management considerations on the Kenai Peninsula, Alaska. *Alces* 25**,** 1-10.

Selman, W. (2018). LIFE IN SKINNY WATER: OBSERVATIONS OF JUVENILE DIAMONDBACK TERRAPINS (MALACLEMYS TERRAPIN) UTILIZING SHALLOW WATER HABITATS. *Herpetological Conservation and Biology* 13(2)**,** 399-407.

Sharp, S.J., and Angelini, C. (2016). Whether disturbances alter salt marsh soil structure dramatically affects Spartina alterniflora recolonization rate. *Ecosphere* 7(11).

Smith, T.S., Oyster, J., Partridge, S.D., Martin, I.E., and Sisson, A. (2012). Assessing American black bear response to human activity at Kenai Fjords National Park, Alaska. *Ursus* 23(2)**,** 179-192.

Smith, T.S., Partridge, S.T., and Schoen, J.W. (2004). Interactions of brown bears, Ursus arctos, and gray wolves, Canis lupus, at Katmai National Park and Preserve, Alaska. *The Canadian Field-Naturalist* 118(2)**,** 247-250.

Stander, P. (2019). Lions (Panthera leo) specialising on a marine diet in the Skeleton Coast National Park, Namibia. *Namibian J. Environ.* 3**,** 1-10.

Stoneburner, D., Richardson, J., and Williamson, G. (1982). Observations on the movement of hatchling sea turtles. *Copeia* 1982(4)**,** 963-965.

Sweers, W., Horn, S., Grenzdörffer, G., and Müller, J. (2013). Regulation of reed (Phragmites australis) by water buffalo grazing: use in coastal conservation. *Mires & Peat* 13.

Taggart, J.B. (2008). Management of feral horses at the North Carolina National Estuarine Research Reserve. *Natural Areas Journal* 28(2)**,** 187-196.

Tinker, M.T., Espinosa, S.M., Staedler, M.M., Tomoleoni, J.A., Fujii, J., Eby, R., et al. (2018). "The Population Status and Ecology of Sea Otters in Elkhorn Slough, California", in: *Final Report for California Coastal Conservancy and U.S. Fish and Wildlife Service.*).

Turner, M.G. (1987). Effects of grazing by feral horses, clipping, trampling, and burning on a Georgia salt marsh. *Estuaries* 10(1)**,** 54-60.

Wingard, G.L., and Lorenz, J.J. (2014). Integrated conceptual ecological model and habitat indices for the southwest Florida coastal wetlands. *Ecological indicators* 44**,** 92-107.

Wood, J.M., Woodward, A.R., Humphrey, S.R., and Hines, T.C. (1985). Night counts as an index of American alligator population trends. *Wildlife Society Bulletin (1973-2006)* 13(3)**,** 262-273.

Young, R.F., and Phillips, H.D. (2002). Primary production required to support bottlenose dolphins in a salt marsh estuarine creek system. *Marine Mammal Science* 18(2)**,** 358-373.
